# Supplementary material for: Antioxidant Activity and Cytotoxicity against Cancer Cell Lines of the Extracts from Novel Xylaria Species Associated with Termite Nests and LC-MS Analysis
Source: MDPI journal article supplement (doi:10.3390/antiox10101557), 2021-09-29
Supplement: s1 [file s1]

## Supplementary Materials

**Table S1:** IC<sub>50</sub> values of antioxidant activities, DPPH and ABTS radical scavenging and total phenolic content of ethyl acetate extracts of *Xylaria* spp. and standard BHT and Trolox. Data expressed as means ± standard deviation. Means within each graph with different letters (a–g) differ significantly (P < 0.05)

| Samples                               | DPPH                           | ABTS                           | TPC                          |
|---------------------------------------|--------------------------------|--------------------------------|------------------------------|
|                                       | IC <sub>50</sub> value (mg/ml) | IC <sub>50</sub> value (mg/ml) | (g GAE/g extract)            |
| <i>X. subintraflava</i> SWUF16-11.1   | 0.654 ± 0.032 <sup>e</sup>     | 0.054 ± 0.006 <sup>bc</sup>    | 1.954 ± 0.088 <sup>bc</sup>  |
| <i>X. subintraflava</i> SWUF17-24.2   | 0.879 ± 0.040 <sup>f</sup>     | 0.119 ± 0.014 <sup>d</sup>     | 1.563 ± 0.031 <sup>cde</sup> |
| <i>X. siamensis</i> SWUF17-20.2       | 0.484 ± 0.017 <sup>d</sup>     | 0.047 ± 0.008 <sup>bc</sup>    | 2.232 ± 0.176 <sup>b</sup>   |
| <i>X. chaiyaphumensis</i> SWUF17-49.2 | 0.831 ± 0.060 <sup>f</sup>     | 0.187 ± 0.030 <sup>e</sup>     | 1.278 ± 0.058 <sup>ef</sup>  |
| <i>X. chaiyaphumensis</i> SWUF16-4.1  | >1.00 <sup>g</sup>             | 0.283 ± 0.021 <sup>f</sup>     | 0.826 ± 0.123 <sup>f</sup>   |
| <i>X. chaiyaphumensis</i> SWUF16-11.4 | 0.834 ± 0.012 <sup>f</sup>     | 0.109 ± 0.006 <sup>d</sup>     | 1.204 ± 0.043 <sup>ef</sup>  |
| <i>X. thienhirunae</i> SWUF17-44.1    | 0.512 ± 0.012 <sup>d</sup>     | 0.047 ± 0.003 <sup>bc</sup>    | 2.009 ± 0.054 <sup>bc</sup>  |
| <i>X. thienhirunae</i> SWUF16-10.1    | 0.541 ± 0.018 <sup>d</sup>     | 0.070 ± 0.004 <sup>c</sup>     | 1.789 ± 0.211 <sup>bcd</sup> |
| <i>X. thienhirunae</i> SWUF16-7.2     | 0.885 ± 0.022 <sup>f</sup>     | 0.133 ± 0.005 <sup>d</sup>     | 1.423 ± 0.124 <sup>de</sup>  |
| <i>X. vinacea</i> SWUF18-2.3          | 0.194 ± 0.031 <sup>c</sup>     | 0.020 ± 0.004 <sup>ab</sup>    | 3.629 ± 0.381 <sup>a</sup>   |
| BHT                                   | 0.105 ± 0.006 <sup>b</sup>     | 0.006 ± 0.000 <sup>a</sup>     | -                            |
| Trolox                                | 0.004 ± 0.000 <sup>a</sup>     | 0.003 ± 0.000 <sup>a</sup>     | -                            |

Data expressed as means ± standard deviation. Means within each column with different letters (a–g) differ significantly (P < 0.05).

**Table S2:** Cytotoxicity of EtOAc extracts of *Xylaria* spp. against four different cell lines, A549, HepG2, HeLa and PNT2, at concentration of 100 µg/mL. Data expressed as means ± standard deviation. Means within each graph with different letters (a–g) differ significantly (P < 0.05)

| Samples                               | % Cell viability            |                             |                            |                            |
|---------------------------------------|-----------------------------|-----------------------------|----------------------------|----------------------------|
|                                       | A549                        | HepG2                       | HeLa                       | PNT2                       |
| <i>X. subintraflava</i> SWUF16-11.1   | 13.16 ± 3.59 <sup>a</sup>   | 11.15 ± 0.32 <sup>a</sup>   | 11.97 ± 1.28 <sup>a</sup>  | 13.17 ± 2.37 <sup>a</sup>  |
| <i>X. subintraflava</i> SWUF17-24.2   | 28.58 ± 0.95 <sup>b</sup>   | 38.54 ± 1.90 <sup>b</sup>   | 34.86 ± 5.05 <sup>b</sup>  | 59.94 ± 6.76 <sup>bc</sup> |
| <i>X. siamensis</i> SWUF17-20.2       | 83.09 ± 7.79 <sup>ef</sup>  | 83.85 ± 8.50 <sup>ef</sup>  | 64.15 ± 9.35 <sup>cd</sup> | 80.95 ± 2.63 <sup>de</sup> |
| <i>X. chaiyaphumensis</i> SWUF17-49.2 | 45.14 ± 2.53 <sup>c</sup>   | 51.92 ± 3.27 <sup>bc</sup>  | 61.20 ± 4.20 <sup>cd</sup> | 73.10 ± 2.45 <sup>cd</sup> |
| <i>X. chaiyaphumensis</i> SWUF16-4.1  | 69.64 ± 4.37 <sup>de</sup>  | 75.38 ± 5.30 <sup>de</sup>  | 63.74 ± 2.02 <sup>cd</sup> | 72.00 ± 5.55 <sup>cd</sup> |
| <i>X. chaiyaphumensis</i> SWUF16-11.4 | 73.66 ± 7.56 <sup>def</sup> | 67.02 ± 5.81 <sup>cd</sup>  | 55.46 ± 0.60 <sup>c</sup>  | 60.57 ± 8.52 <sup>bc</sup> |
| <i>X. thienhirunae</i> SWUF17-44.1    | 86.47 ± 2.97 <sup>fg</sup>  | 78.05 ± 5.58 <sup>de</sup>  | 66.69 ± 3.83 <sup>cd</sup> | 88.84 ± 3.48 <sup>ef</sup> |
| <i>X. thienhirunae</i> SWUF16-10.1    | 87.26 ± 7.45 <sup>fg</sup>  | 104.12 ± 6.55 <sup>g</sup>  | 91.82 ± 1.91 <sup>e</sup>  | 99.68 ± 4.67 <sup>f</sup>  |
| <i>X. thienhirunae</i> SWUF16-7.2     | 66.44 ± 5.85 <sup>d</sup>   | 77.28 ± 11.26 <sup>de</sup> | 71.23 ± 4.41 <sup>d</sup>  | 79.67 ± 0.57 <sup>de</sup> |
| <i>X. vinacea</i> SWUF18-2.3          | 72.72 ± 1.33 <sup>de</sup>  | 75.06 ± 4.47 <sup>de</sup>  | 42.65 ± 3.32 <sup>b</sup>  | 49.78 ± 6.32 <sup>b</sup>  |
| Doxorubicin                           | 20.32 ± 1.09 <sup>ab</sup>  | 19.47 ± 0.37 <sup>a</sup>   | 15.99 ± 0.55 <sup>a</sup>  | 18.47 ± 4.40 <sup>a</sup>  |
| Medium                                | 100.00 <sup>g</sup>         | 100.00 <sup>fg</sup>        | 100.00 <sup>e</sup>        | 100.00 <sup>f</sup>        |

Data expressed as means ± standard deviation. Means within each column with different letters (a–g) differ significantly (P < 0.05).

**Table S3:** Mass spectra data of peaks from *Xylaria* species and identified compounds

| Peak No. | <i>t<sub>R</sub></i> (min) | MS data (m/z)                              | Isolates                 | m/z of predicted compounds                             | Predicted compounds                      | Group of compounds   | References |
|----------|----------------------------|--------------------------------------------|--------------------------|--------------------------------------------------------|------------------------------------------|----------------------|------------|
| 1        | 2.14-2.20                  | 197.1, 227.1, 261.1                        | all                      |                                                        | prednisone                               | steroids derivatives |            |
| 2        | 3.19-3.42                  | 183.1, 211.1                               | all                      |                                                        | xylaropyrone                             | pyrone               |            |
| 3        | 4.24-4.35                  | 154.0, 217.1, 245.1, 331.0                 | all                      |                                                        | unknown 1                                |                      |            |
| 4        | 6.54                       | 233.0, 389.1, 411.0, 799.1                 | SWUF18-2.3               |                                                        | unknown 2                                |                      |            |
| 5        | 9.31-9.72                  | 402.2, 556.2, 562.2, 578.2, 1103.4, 1133.4 | SWUF16-11.1              |                                                        | unknown 3                                |                      |            |
| 6        | 10.27                      | 217.1, 245.1, 313.1                        | SWUF17-24.2              |                                                        | unknown 4                                |                      |            |
| 7        | 10.32                      | 185.0, 222.1, 268.1, 302.0, 375.1          | SWUF18-2.3               |                                                        | unknown 5                                |                      |            |
| 8        | 10.52                      | 151.0, 183.1, 225.1, 285.1, 331.1          | SWUF16-7.2               |                                                        | unknown 6                                |                      |            |
| 9        | 11.22-11.29                | 404.2, 428.2, 446.2, 524.2, 546.2, 1069.5  | SWUF16-11.1, SWUF17-24.2 | 524.2, [M+H] <sup>+</sup> , 546.2, [M+Na] <sup>+</sup> | 19,20-epoxy cytochalasin C or derivative | cytochalasin         | [1]        |
| 10       | 11.37                      | 233.0, 373.1,                              | SWUF18-2.3               |                                                        | 11- $\alpha$ -acetoxyprogesterone        | progesterone         |            |

| Peak No. | $t_R$ (min) | MS data (m/z)                                    | Isolates                 | m/z of predicted compounds                             | Predicted compounds                      | Group of compounds | References |
|----------|-------------|--------------------------------------------------|--------------------------|--------------------------------------------------------|------------------------------------------|--------------------|------------|
|          |             | 395.0, 767.1                                     |                          |                                                        |                                          |                    |            |
| 11       | 11.67-11.69 | 173.0, 285.1, 343.1, 469.1, 627.1                | SWUF16-10.1, SWUF16-7.2  |                                                        | unknown 7                                |                    |            |
| 12       | 11.71       | 173.0, 309.1, 469.1, 627.1                       | SWUF16-11.4              |                                                        | unknown 8                                |                    |            |
| 13       | 11.84       | 267.1, 285.1, 357.2                              | SWUF17-44.1              |                                                        | lagochilin                               | diterpene          |            |
| 14       | 12.46       | 188.1, 343.2, 665.4, 695.3                       | SWUF17-24.2              |                                                        | unknown 9                                |                    |            |
| 15       | 12.86-12.94 | 370.1, 404.2, 524.2, 546.2, 562.2, 1069.5        | SWUF16-11.1              | 524.2, [M+H] <sup>+</sup> , 546.2, [M+Na] <sup>+</sup> | 19,20-epoxy cytochalasin C or derivative | cytochalasin       | [1]        |
| 16       | 13.18       | 223.1, 322.2, 325.1, 385.2, 398.2                | SWUF16-10.1              |                                                        | unknown 10                               |                    |            |
| 17       | 13.48-13.61 | 404.2, 428.2, 446.2, 524.2, 546.2, 562.2, 1069.5 | SWUF16-11.1, SWUF17-24.2 | 524.2, [M+H] <sup>+</sup> , 546.2, [M+Na] <sup>+</sup> | 19,20-epoxy cytochalasin C or derivative | cytochalasin       | [1]        |
| 18       | 14.28       | 287.1, 373.1                                     | SWUF18-2.3               |                                                        | unknown 11                               |                    |            |
| 19       | 14.34-14.38 | 169.1, 225.1, 285.1, 325.1, 357.2                | SWUF17-44.1, SWUF16-10.1 |                                                        | colchicine                               | tropones           |            |

| Peak No. | $t_R$ (min) | MS data (m/z)                                     | Isolates    | m/z of predicted compounds                                 | Predicted compounds | Group of compounds | References |
|----------|-------------|---------------------------------------------------|-------------|------------------------------------------------------------|---------------------|--------------------|------------|
| 20       | 14.51-14.58 | 418.2, 434.3, <b>597.3</b> , 619.3                | SWUF16-11.1 |                                                            | unknown 12          |                    |            |
| 21       | 14.53       | <b>263.1</b> , 327.1, 437.2                       | SWUF17-20.2 |                                                            | unknown 13          |                    |            |
| 22       | 14.71       | 287.1, 315.1, <b>701.2</b> , 1051.4, 1401.5       | SWUF18-2.3  |                                                            | andrographolide     | diterpenoid        |            |
| 23       | 14.78       | 196.0, 352.2, <b>431.2</b> , 453.2, 883.4         | SWUF17-49.2 | 431.2 [M + H] <sup>+</sup> , 883.5 [2 M + Na] <sup>+</sup> | euphyperin B        | triterpenoids      | [2]        |
| 24       | 14.81       | <b>287.2</b> , <b>345.0</b> , 437.2, 501.2, 675.2 | SWUF16-7.2  |                                                            | unknown 14          |                    |            |
| 25       | 14.86       | 321.2, <b>357.2</b> , 437.2                       | SWUF16-10.1 |                                                            | unknown 15          |                    |            |
| 26       | 14.91       | 287.1, <b>509.2</b> , 675.2, 995.5                | SWUF16-11.4 |                                                            | unknown 16          |                    |            |
| 27       | 15.54-15.59 | 265.1, 402.2, 430.2, <b>530.2</b> , 546.2, 1037.5 | SWUF16-11.1 |                                                            | unknown 17          |                    |            |
| 28       | 15.89       | <b>367.2</b> , <b>383.2</b>                       | SWUF18-2.3  |                                                            | tofisopam           | benzodiazepines    |            |
| 29       | 16.14       | 151.1, 243.1, 370.2, <b>517.3</b> , <b>539.3</b>  | SWUF17-24.2 |                                                            | rottlerin           | polyphenol         |            |

| Peak No. | $t_R$ (min)     | MS data (m/z)                                                | Isolates                            | m/z of predicted compounds | Predicted compounds | Group of compounds | References |
|----------|-----------------|--------------------------------------------------------------|-------------------------------------|----------------------------|---------------------|--------------------|------------|
| 30       | 16.21           | 177.1,<br>269.1,<br>297.1,<br><b>315.1</b> ,<br>369.2        | SWUF16-<br>11.4                     |                            | unknown 18          |                    |            |
| 31       | 16.23           | 151.1,<br>243.1,<br>370.2,<br><b>517.3</b> ,<br><b>539.3</b> | SWUF16-<br>11.1                     |                            | rottlerin           | polyphenol         |            |
| 32       | 16.69           | 269.1,<br><b>287.1</b> ,<br>437.2                            | SWUF16-<br>7.2                      |                            | unknown 19          |                    |            |
| 33       | 16.76-<br>16.84 | 271.2,<br><b>317.2</b>                                       | SWUF16-<br>4.1,<br>SWUF16-<br>11.4  |                            | unknown 20          |                    |            |
| 34       | 17.19-<br>17.21 | 275.2,<br>402.2,<br><b>581.2</b> ,<br><b>603.3</b>           | SWUF16-<br>11.1,<br>SWUF17-<br>24.2 |                            | naringin            | flavonoids         |            |
| 35       | 17.78           | 231.1,<br><b>475.2</b> ,<br>927.5                            | SWUF16-<br>11.4                     |                            | unknown 21          |                    |            |
| 36       | 17.91-<br>17.98 | 151.1,<br>284.3,<br><b>389.1</b>                             | SWUF16-<br>11.1,<br>SWUF17-<br>24.2 |                            | unknown 22          |                    |            |
| 37       | 18.28           | <b>369.2</b> ,<br>747.2                                      | SWUF18-<br>2.3                      |                            | unknown 23          |                    |            |
| 38       | 18.3            | 231.1,<br>284.3,<br><b>475.2</b> ,<br>927.5                  | SWUF16-<br>11.4                     |                            | unknown 24          |                    |            |
| 39       | 18.41-<br>18.48 | 243.1,<br>370.2,<br><b>585.3</b> ,<br>607.3                  | SWUF16-<br>11.1,<br>SWUF17-<br>24.2 |                            | unknown 25          |                    |            |
| 40       | 18.48           | 284.3,<br>385.2,<br><b>425.2</b>                             | SWUF17-<br>20.2                     |                            | unknown 26          |                    |            |

| Peak No. | $t_R$ (min) | MS data (m/z)               | Isolates                              | m/z of predicted compounds | Predicted compounds                               | Group of compounds | References |
|----------|-------------|-----------------------------|---------------------------------------|----------------------------|---------------------------------------------------|--------------------|------------|
| 41       | 18.78       | 367.2, 743.4                | SWUF18-2.3                            |                            | unknown 27                                        |                    |            |
| 42       | 19.08       | 369.2, 693.5, 747.4, 1039.7 | SWUF18-2.3                            |                            | unknown 28                                        |                    |            |
| 43       | 19.15-19.18 | 275.1, 565.3, 649.3, 671.3  | SWUF16-11.1, SWUF17-24.2              |                            | unknown 29                                        |                    |            |
| 44       | 19.36       | 299.1, 371.2                | SWUF16-11.4                           |                            | unknown 30                                        |                    |            |
| 45       | 19.83       | 389.1, 489.1                | SWUF18-2.3                            |                            | unknown 31                                        |                    |            |
| 46       | 19.83-19.90 | 181.1, 296.2                | SWUF16-11.1, SWUF17-24.2              |                            | unknown 32                                        |                    |            |
| 47       | 20.83       | 402.3, 549.3, 571.3         | SWUF17-24.2, SWUF16-11.1, SWUF17-49.2 |                            | animicin A                                        | antimycin          |            |
| 48       | 21.43       | 268.2, 591.3, 613.3         | SWUF17-20.2                           |                            | unknown 33                                        |                    |            |
| 49       | 21.5        | 304.2, 309.2, 595.4         | SWUF17-24.2                           |                            | tiliroside                                        | flavones           |            |
| 50       | 21.78       | 797.4, 819.4                | SWUF16-11.4                           |                            | 4'-O-(2'-Z-Feruloyl GluA(1-2)GluA) apigenin (NMR) | flavones           |            |
| 51       | 21.95       | 425.2, 443.2, 625.3, 1205.7 | SWUF16-11.1                           |                            | unknown 34                                        |                    |            |
| 52       | 22.01       | 603.3, 625.3, 694.4         | SWUF17-49.2                           |                            | unknown 35                                        |                    |            |

| Peak No. | $t_R$ (min)     | MS data (m/z)                                  | Isolates                                               | m/z of predicted compounds        | Predicted compounds | Group of compounds    | References |
|----------|-----------------|------------------------------------------------|--------------------------------------------------------|-----------------------------------|---------------------|-----------------------|------------|
| 53       | 22.35           | 233.0,<br>353.2                                | SWUF18-<br>2.3                                         |                                   | unknown 36          |                       |            |
| 54       | 22.48-<br>22.53 | 402.2,<br>470.3,<br>617.3,<br>639.3,<br>1255.7 | SWUF16-<br>11.1,<br>SWUF17-<br>49.2,<br>SWUF16-<br>4.1 |                                   | unknown 37          |                       |            |
| 55       | 23.11-<br>23.16 | 825.5,<br>847.5                                | SWUF17-<br>49.2,<br>SWUF16-<br>4.1,<br>SWUF16-<br>11.4 |                                   | unknown 38          |                       |            |
| 56       | 23.55           | 231.1,<br>489.2                                | SWUF16-<br>11.4                                        |                                   | unknown 39          |                       |            |
| 57       | 24.28-<br>24.33 | 853.5,<br>875.5                                | SWUF17-<br>49.2,<br>SWUF16-<br>4.1,<br>SWUF16-<br>11.4 |                                   | unknown 40          |                       |            |
| 58       | 25.28-<br>25.30 | 881.5,<br>903.5                                | SWUF17-<br>49.2,<br>SWUF16-<br>4.1                     |                                   | unknown 41          |                       |            |
| 59       | 25.98           | 355.2,<br>909.6,<br>931.6                      | SWUF17-<br>49.2,<br>SWUF16-<br>4.1                     | [M+Na] <sup>+</sup> m/<br>z 931.6 | bassianolide        | cyclodepsipep<br>tide | [3]        |
| 60       | 28.20-<br>28.32 | 181.0,<br>195.0,<br>413.2,<br>445.3,<br>803.5  | all                                                    |                                   | unknown 42          |                       |            |
| 61       | 29.13           | 338.3,<br>360.3                                | SWUF17-<br>44.1                                        |                                   | unknown 43          |                       |            |



## References

1. Abate, D.; Abraham, W.-R.; Meyer, H. Cytochalasins and phytotoxins from the fungus *Xylaria obovata*. *Phytochemistry* **1997**, *44*, 1443–1448, doi:10.1016/S0031-9422(96)00780-7.
2. Zhao, J.X.; Shi, S.S.; Sheng, L.; Li, J.; Yue, J.M. Terpenoids and Steroids from *Euphorbia hypericifolia*. *Nat. Prod. Commun.* **2015**, *10*, 2049–2052.
3. Jirakkakul, J.; Punya, J.; Pongpattanakitsote, S.; Paungmoung, P.; Vorapreeda, N.; Tachaleat, A.; Klomnara, C.; Tanticharoen, M.; Cheevadhanarak, S. Identification of the nonribosomal peptide synthetase gene responsible for bassianolide synthesis in wood-decaying fungus *Xylaria* sp. BCC1067. *Microbiology* **2008**, *154*, 995–1006, doi:10.1099/mic.0.2007/013995-0.
